# Supplementary material
Source: PubMed Central journal article supplement (PMC5704914)
Supplement: NIHMS920713-supplement-Supplementary_Material.pdf [file NIHMS920713-supplement-Supplementary_Material.pdf]

$\alpha$ -Actinin Promotes Surface Localization and Ion  
Conducting Activity of the  $\text{Ca}^{2+}$  Channel  $\text{Ca}_v1.2$  by  
Binding to the IQ Region of the  $\alpha 1$  Subunit

*Pang-Yen Tseng<sup>1†</sup>, Peter B. Henderson<sup>1</sup>, Anne C. Hergarden, Tommaso Patriarchi,  
Andrea Coleman, Mark W. Lillya, Carlota Montagut-Bordas<sup>†</sup>, Boram Lee,  
Johannes W. Hell<sup>\*</sup> and Mary C. Horne<sup>\*</sup>*

From the Department of Pharmacology, School of Medicine,

University of California Davis, CA 95615-8636, USA

**SUPPORTING INFORMATION**

**Table S1: Oligonucleotides used to create rabbit  $\alpha_1$ 1.2 expression constructs utilizing NdeI/EcoRI restriction sites (underlined) for yeast two-hybrid interaction studies.**

|               |    |                                                            |
|---------------|----|------------------------------------------------------------|
| AAs 1-123     | 5' | CCG CGC <u>CAT ATG</u> GTC AAT GAA AAC ACG AGG ATG         |
|               | 3' | GCC CGG <u>GAA TTC</u> TAC CAT TCA ACA ATG CTG ATG CA      |
| AAs 1506-1871 | 5' | GGC CCG <u>CAT ATG</u> GAC AAC TTT GAC TAC CTG ACA         |
|               | 3' | CGG CCG <u>GAA TTC</u> AGA TCC TCA CGT CGT AGT TCT C       |
| AAs 1506-1638 | 5' | GGC CCG <u>CAT ATG</u> GAC AAC TTT GAC TAC CTG ACA         |
|               | 3' | CTC ATG <u>AAT TCA</u> TGC AGG GGG CAC CAC TTG GTC         |
| AAs 1639-1871 | 5' | GTG CCC <u>CAT ATG</u> GGC GAT GAT GAG GTC ACA GTC         |
|               | 3' | CGC TGC <u>AGG AAT TCA</u> GAT CCT CAC GTC GTA GTT GTC GTC |
| AAs 1506-1610 | 5' | GGC CCG <u>CAT ATG</u> GAC AAC TTT GAC TAC CTG ACA         |
|               | 3' | CAG CTC <u>CTG AAT TCA</u> TTG TTC CAG GTT TCC TTC TGT     |

**Table S2: Oligonucleotides used to produce human  $\alpha$ -Actinin-1 expression constructs utilizing NdeI/EcoRI restriction sites (underlined) for yeast two-hybrid interaction studies.**

|             |    |                                                            |
|-------------|----|------------------------------------------------------------|
| SR234EF     | 5' | CGG AGG <u>CAT ATG</u> CGA CTG GAC CAC CTG GCA GAG         |
| AAs 391-892 | 3' | CGC GTT <u>GAA TTC</u> TTA GAG GTC ACT CTC GCC GTA CAG     |
| Full Length | 5' | CGC GAT <u>CAT ATG</u> GAC CAT TAT GAT TCT CAG C           |
| AAs 1-892   | 3' | CGC GTT <u>GAA TTC</u> TTA GAG GTC ACT CTC GCC GTA CAG C   |
| CH12        | 5' | CGC GAT <u>CAT ATG</u> GAC CAT TAT GAT TCT CAG C           |
| AAs 1-260   | 3' | CTT <u>GCG AAT TCA</u> ATT GGC TGC TGT CTC CGC CTT         |
| SR1234      | 5' | ACA GCA <u>CAT ATG</u> TGC ATC TGC AAG GTG TTG GCC         |
| AAs 261-740 | 3' | GCT <u>GAG AAT TCA</u> GGC ATC CCG GGT CAG GAT CTG         |
| EF hands    | 5' | ATC ACC CGG <u>CAT ATG</u> AAG GGC ATC AGC CAG GAG         |
| AAs 741-892 | 3' | CGC GTT <u>GAA TTC</u> TTA GAG GTC ACT CTC GCC GTA CAG     |
| CH12SR1     | 5' | CGC GAT <u>CAT ATG</u> GAC CAT TAT GAT TCT CAG C           |
| AAs 1-390   | 3' | GTG <u>GTG AAT TCA</u> CTC CAG CCT CCG GAT CTC ATT         |
| SR123       | 5' | ACA GCA <u>CAT ATG</u> TGC ATC TGC AAG GTG TTG GCC         |
| AAs 261-625 | 3' | CTC <u>ATG AAT TCA</u> CTG TCG GGC ATG CTC CTC CGT         |
| SR4EF       | 5' | CAT GCC <u>CAT ATG</u> CAG CAC AAT GAG AGG CTA CGC         |
| AAs 626-892 | 3' | CGC GTT <u>GAA TTC</u> TTA GAG GTC ACT CTC GCC GTA CAG C   |
| SR234       | 5' | CGG AGG <u>CAT ATG</u> CGA CTG GAC CAC CTG GCA GAG         |
| AAs 391-740 | 3' | GCT <u>GAG AAT TCA</u> GGC ATC CCG GGT CAG GAT CTG         |
| SR12        | 5' | ACA GCA <u>CAT ATG</u> TGC ATC TGC AAG GTG TTG GCC         |
| AAs 261-505 | 3' | CTG <u>GTG AAT TCA</u> CTC CAG CAG TTT CTC GGT CCG         |
| SR34        | 5' | GAG AAA CTG <u>CAT ATG</u> ACC ATT GAC CAG CTG TAC TTG GAG |
| AAs 506-740 | 3' | GCT <u>GAG AAT TCA</u> GGC ATC CCG GGT CAG GAT CTG         |

**Table S3: Oligonucleotides used to create triple alanine mutations (underlined) in rabbit  $\alpha_11.2$  expression constructs for yeast two-hybrid interaction studies.**

|       |    |                                                                    |
|-------|----|--------------------------------------------------------------------|
| AAA-1 | 5' | GCA GGC GAT GAT GAG GTC <u>GCG GCC GCC</u> AAG TTC TAC GCT ACC TTT |
|       | 3' | AAA GGT AGC GTA GAA CTT <u>GGC GGC CGC</u> GAC CTC ATC ATC GCC TGC |
| AAA-2 | 5' | GAT GAG GTC ACA GTC GGC <u>GCG GCC GCC</u> GCT ACC TTT CTG ATC CAA |
|       | 3' | TTG GAT CAG AAA GGT AGC <u>GGC GGC CGC</u> GCC GAC TGT GAC CTC ATC |
| AAA-3 | 5' | GTC GGC AAG TTC TAC <u>GCG GCC GCT</u> CTG ATC CAA GAG TAC         |
|       | 3' | GTA CTC TTG GAT CAG <u>AGC GGC CGC</u> GTA GAA CTT GCC GAC         |
| AAA-4 | 5' | AAG TTC TAC GCT ACC TTT <u>GCG GCC GCA</u> GAG TAC TTC CGG AAA TTC |
|       | 3' | GAA TTT CCG GAA GTA CTC <u>TGC GGC CGC</u> AAA GGT AGC GTA GAA CTT |
| AAA-5 | 5' | GCT ACC TTT CTG ATC CAA <u>GCG GCC GCC</u> CGG AAA TTC AAG AAG CGC |
|       | 3' | GCG CTT CTT GAA TTT CCG <u>GGC GGC CGC</u> TTG GAT CAG AAA GGT AGC |
| AAA-6 | 5' | ATC CAA GAG TAC TTC <u>GCG GCC GCC</u> AAG AAG CGC AAA GAG         |
|       | 3' | CTC TTT GCG CTT CTT <u>GGC GGC CGC</u> GAA GTA CTC TTG GAT         |
| AAA-7 | 5' | TAC TTC CGG AAA TTC <u>GCG GCC GCC</u> AAA GAG CAA GGG CTT         |
|       | 3' | AAG CCC TTG CTC TTT <u>GGC GGC CGC</u> GAA TTT CCG GAA GTA         |
| AAA-8 | 5' | CGG AAA TTC AAG AAG CGC <u>GCG GCC GCC</u> GGG CTT GTG GGC AAG CCC |
|       | 3' | GGG CTT GCC CAC AAG CCC <u>TGC GGC CGC</u> GCG CTT CTT GAA TTT CCG |
| AAA-9 | 5' | AAG CGC AAA GAG CAA <u>GCG GCC GCC</u> GGC AAG CCC TCC CAG         |
|       | 3' | CTG GGA GGG CTT GCC <u>GGC GGC CGC</u> TTG CTC TTT GCG CTT         |

**Table S4: Oligonucleotides used to create single alanine mutations (underlined) in rabbit  $\alpha_11.2$  expression constructs for yeast two-hybrid interaction studies and pull-down assays.**

|        |    |                                                                    |
|--------|----|--------------------------------------------------------------------|
| K1647A | 5' | GAT GAG GTC ACA GTC GGC <u>GCA</u> TTC TAC GCT ACC TTT CTG ATC CAA |
|        | 3' | TTG GAT CAG AAA GGT AGC GTA GAA <u>TGC</u> GCC GAC TGT GAC CTC ATC |
| F1648A | 5' | GAT GAG GTC ACA GTC GGC AAG <u>GCA</u> TAC GCT ACC TTT CTG ATC CAA |
|        | 3' | TTG GAT CAG AAA GGT AGC GTA <u>TGC</u> CTT GCC GAC TGT GAC CTC ATC |
| Y1649A | 5' | GAT GAG GTC ACA GTC GGC AAG TTC <u>GCA</u> GCT ACC TTT CTG ATC CAA |
|        | 3' | TTG GAT CAG AAA GGT AGC TGC GAA CTT GCC GAC TGT GAC CTC ATC        |
| L1653A | 5' | AAG TTC TAC GCT ACC TTT <u>GCA</u> ATC CAA GAG TAC TTC CGG AAA TTC |
|        | 3' | GAA TTT CCG GAA GTA CTC TTG GAT <u>TGC</u> AAA GGT AGC GTA GAA CTT |
| I1654A | 5' | AAG TTC TAC GCT ACC TTT CTG <u>GCA</u> CAA GAG TAC TTC CGG AAA TTC |
|        | 3' | GAA TTT CCG GAA GTA CTC TTG <u>TGC</u> CAG AAA GGT AGC GTA GAA CTT |
| Q1655A | 5' | AAG TTC TAC GCT ACC TTT CTG ATC <u>GCA</u> GAG TAC TTC CGG AAA TTC |
|        | 3' | GAA TTT CCG GAA GTA CTC <u>TGC</u> GAT CAG AAA GGT AGC GTA GAA CTT |

**Table S5: Oligonucleotides used to create single alanine mutations (underlined) in rat  $\alpha_1$ 1.2 expression constructs for electrophysiological and surface expression assays.**

|        |    |                                                            |
|--------|----|------------------------------------------------------------|
| K1647A | 5' | GAC GAG GTC ACA GTG GGC <u>GCA</u> TTC TAT GCC ACC TTC CTG |
|        | 3' | CAG GAA GGT GGC ATA GAA <u>TGC</u> GCC CAC TGT GAC CTC GTC |
| F1648A | 5' | GAG GTC ACA GTG GGC AAA <u>GCC</u> TAT GCC ACC TTC CTG ATC |
|        | 3' | GAT CAG GAA GGT GGC ATA <u>GGC</u> TTT GCC CAC TGT GAC CTC |
| Y1649A | 5' | GTC ACA GTG GGC AAA TTC <u>GCT</u> GCC ACC TTC CTG ATC CAA |
|        | 3' | TTG GAT CAG GAA GGT GGC <u>AGC</u> GAA TTT GCC CAC TGT GAC |
| I1654A | 5' | TTC TAT GCC ACC TTC CTG <u>GCC</u> CAA GAG TAC TTC AGG AAA |
|        | 3' | TTT CCT GAA GTA CTC TTC <u>GGC</u> CAG GAA GGT GGC ATA GAA |
| Q1655A | 5' | TAT GCC ACC TTC CTG ATC <u>GCA</u> GAG TAC TTC AGG AAA TTC |
|        | 3' | GAA TTT CCT GAA GTA CTC <u>TGC</u> GAT CAG GAA GGT GGC ATA |
| F1658A | 5' | TTC CTG ATC CAA GAG TAC <u>GCC</u> AGG AAA TTC AAG AAG CGA |
|        | 3' | TCG CTT CTT GAA TTT CCT <u>GGC</u> GTA CTC TTG GAT CAG GAA |
